# Supplementary material for: TP53-Mutated Circulating Tumor DNA for Disease Monitoring in Lymphoma Patients after CAR T Cell Therapy
Source: MDPI journal article supplement (doi:10.3390/diagnostics11050844), 2021-05-08
Supplement: s1 [file s1]

# Supplemental files

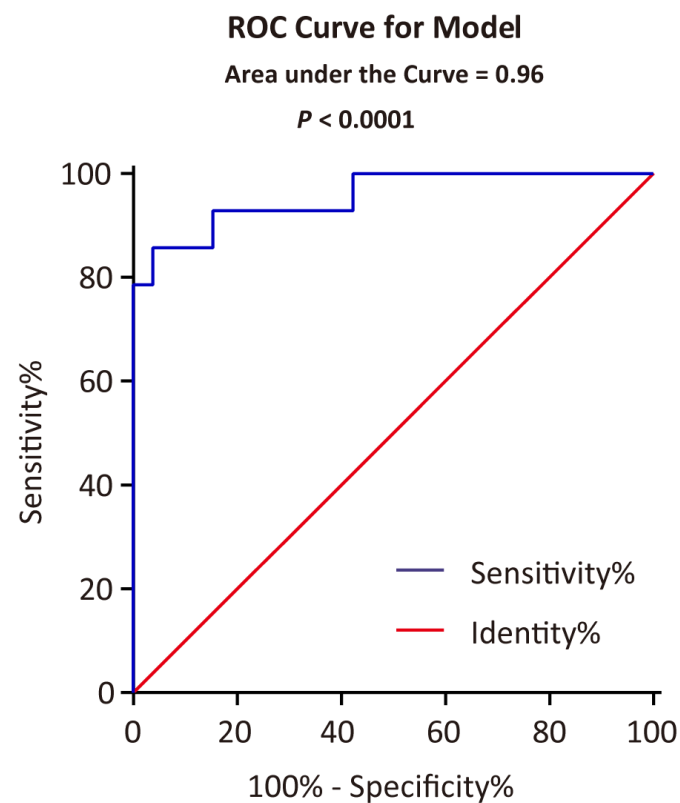

**Figure S1.** ROC evaluation of the performance of TP53 MAF in predicting disease progression.

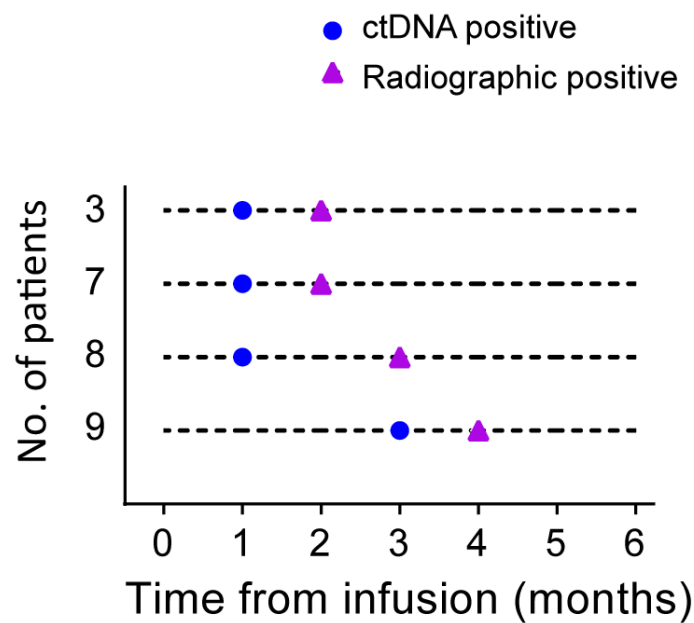

**Figure S2.** Four patients (3, 7, 8,9) that who has positive result in ctDNA level earlier than that with CT imaging.

**Table S1.** Clinical characteristics of all the patients.

| No. of Patient | Gender | Age | Ann-Arbor Stage | IPI Score | Volumn > 5cm | Disease Status     | Diagnosis | Nucleotide Change  | Mutation Site | with 17p Loss      | IgH/MYC Translocation |
|----------------|--------|-----|-----------------|-----------|--------------|--------------------|-----------|--------------------|---------------|--------------------|-----------------------|
| 1              | M      | 45  | IV              | 3         | No           | Primary refractory | DLBCL     | c.437G>A           | outside       | TP53 mutation only | No                    |
| 2              | M      | 64  | IV              | 3         | Yes          | ≥ Second relapse   | DLBCL     | c.818G>A           | LSH           | TP53 mutation only | No                    |
| 3              | M      | 38  | IV              | 4         | Yes          | ≥ Second relapse   | FL        | c.376T>A           | LSH           | TP53 mutation only | Yes                   |
| 4              | M      | 29  | III             | 4         | Yes          | First relapse      | FL        | c.818G>A           | LSH           | TP53 mutation only | Yes                   |
| 5              | F      | 34  | IV              | 1         | No           | ≥ Second relapse   | DLBCL     | c.695T>A           | outside       | TP53 mutation only | No                    |
| 6              | M      | 27  | II              | 4         | No           | Primary refractory | Burkitt   | c.376-1G>A         | LSH           | TP53 mutation only | Yes                   |
| 7              | M      | 43  | IV              | 3         | Yes          | First relapse      | FL        | c.733G>A           | L3            | TP53 mutation only | No                    |
| 8              | F      | 33  | IV              | 5         | Yes          | Primary refractory | DLBCL     | c.743G>A           | L3            | TP53 mutation only | No                    |
| 9              | M      | 52  | IV              | 2         | No           | First relapse      | DLBCL     | c.714T-G           | L3            | with del (17p)     | Yes                   |
| 10             | M      | 56  | II              | 2         | Yes          | Primary refractory | DLBCL     | c.799C>T           | outside       | TP53 mutation only | Yes                   |
| 11             | M      | 43  | IV              | 3         | Yes          | Primary refractory | DLBCL     | c.725G>A           | L3            | TP53 mutation only | No                    |
| 12             | M      | 47  | III             | 2         | Yes          | ≥ Second relapse   | DLBCL     | c.847-848insATCGGG | LSH           | TP53 mutation only | No                    |
| 13             | M      | 47  | IV              | 3         | No           | Primary refractory | DLBCL     | c.733G>A           | L3            | TP53 mutation only | No                    |
| 14             | M      | 54  | IV              | 3         | Yes          | Primary refractory | MCL       | c.715A>G           | L3            | TP53 mutation only | No                    |
| 15             | M      | 49  | IV              | 3         | No           | Primary refractory | MCL       | c.488A>G           | outside       | TP53 mutation only | No                    |
| 16             | M      | 41  | IV              | 1         | No           | First relapse      | DLBCL     | c.842A>T           | LSH           | TP53 mutation only | No                    |
| 17             | F      | 37  | III             | 1         | No           | Primary refractory | DLBCL     | c.817C>T           | LSH           | with del (17p)     | Yes                   |
| 18             | M      | 39  | IV              | 4         | Yes          | ≥ Second relapse   | DLBCL     | c.743G>A           | L3            | TP53 mutation only | No                    |
| 19             | M      | 37  | IV              | 3         | No           | First relapse      | DLBCL     | c.622G>T           | outside       | TP53 mutation only | Yes                   |
| 20             | M      | 40  | II              | 3         | No           | Primary refractory | HGBL      | c.524G>A           | L2            | TP53 mutation only | Yes                   |
| 21             | M      | 54  | IV              | 1         | No           | Primary refractory | DLBCL     | c.743G>A           | L3            | with del (17p)     | Yes                   |
| 22             | M      | 40  | IV              | 1         | No           | First relapse      | MCL       | c.756delC          | outside       | with del (17p)     | Yes                   |
| 23             | F      | 56  | III             | 3         | Yes          | Primary refractory | DLBCL     | c.524G>A           | L2            | TP53 mutation only | No                    |
| 24             | M      | 44  | III             | 3         | No           | First relapse      | DLBCL     | c.413C>T           | outside       | TP53 mutation only | No                    |
| 25             | F      | 60  | IV              | 3         | Yes          | Primary refractory | DLBCL     | c.637C>T           | outside       | TP53 mutation only | No                    |
| 26             | M      | 58  | IV              | 1         | Yes          | Primary refractory | DLBCL     | c.638G>A           | outside       | TP53 mutation only | No                    |
| 27             | M      | 29  | III             | 1         | Yes          | Primary refractory | DLBCL     | c.743G>A           | L3            | TP53 mutation only | No                    |
| 28             | M      | 42  | III             | 3         | No           | First relapse      | DLBCL     | c.1007_1020del     | outside       | TP53 mutation only | No                    |
| 29             | M      | 42  | IV              | 2         | No           | Primary refractory | DLBCL     | c.844C>T           | LSH           | with del (17p)     | No                    |
| 30             | M      | 32  | IV              | 3         | No           | Primary refractory | DLBCL     | c.700T>G           | outside       | TP53 mutation only | No                    |
| 31             | M      | 53  | III             | 2         | No           | First relapse      | DLBCL     | c.733G>A           | L3            | TP53 mutation only | No                    |
| 32             | F      | 38  | IV              | 3         | No           | Primary refractory | DLBCL     | c.437G>A           | outside       | TP53 mutation only | No                    |
| 33             | M      | 39  | IV              | 3         | Yes          | First relapse      | DLBCL     | c.706T>G           | outside       | TP53 mutation only | Yes                   |
| 34             | F      | 43  | IV              | 3         | Yes          | Primary refractory | DLBCL     | c.818G>A           | LSH           | TP53 mutation only | No                    |
| 35             | M      | 55  | IV              | 2         | No           | ≥ Second relapse   | DLBCL     | c.742C>T           | L3            | TP53 mutation only | No                    |
| 36             | M      | 52  | I               | 1         | Yes          | ≥ Second relapse   | DLBCL     | c.715A>G           | L3            | TP53 mutation only | No                    |
| 37             | M      | 49  | IV              | 2         | No           | First relapse      | DLBCL     | c.744A>C           | outside       | TP53 mutation only | Yes                   |
| 38             | F      | 50  | IV              | 3         | No           | ≥ Second relapse   | DLBCL     | c.818G>A           | LSH           | with del (17p)     | Yes                   |
| 39             | M      | 51  | IV              | 2         | Yes          | First relapse      | DLBCL     | c.747G>C           | L3            | with del (17p)     | No                    |
| 40             | M      | 56  | I               | 1         | No           | ≥ Second relapse   | PCNSL     | c.318C>G           | outside       | TP53 mutation only | No                    |

**Table S2.** False positive rate and PROVEAN score.

| No. of Patient | Protein Change   | Nucleotide Change  | False positive Rate | Threshold | COSMIC ID     | PROVEAN Score | Prediction (Cutoff = -2.5) |
|----------------|------------------|--------------------|---------------------|-----------|---------------|---------------|----------------------------|
| 28             | p.E336fs         | c.1007_1020del     | 0.0001              | 0.0002    | not available | /             | /                          |
| 40             | p.S106R          | c.318C>G           | 0.0001              | 0.0003    | 45944         | -1.171        | Neutral                    |
| 6              | -                | c.376-1G>A         | 0.0000              | 0.0000    | 6900          | /             | /                          |
| 3              | p.Y126N          | c.376T>A           | 0.0000              | 0.0000    | 44380         | -8.317        | Deleterious                |
| 24             | p.A138V          | c.413C>T           | 0.0005              | 0.0014    | 43818         | -3.848        | Deleterious                |
| 1 32           | p.W146*          | c.437G>A           | 0.0000              | 0.0001    | 43609         | /             | /                          |
| 15             | p.Y163C          | c.488A>G           | 0.0000              | 0.0001    | 10808         | -8.623        | Deleterious                |
| 20 23          | p.R175H          | c.524G>A           | 0.0001              | 0.0002    | 43629         | -4.872        | Deleterious                |
| 19             | p.D208Y          | c.622G>T           | 0.0001              | 0.0003    | 10726         | -7.998        | Deleterious                |
| 25             | p.R213*          | c.637C>T           | 0.0001              | 0.0002    | 10654         | /             | /                          |
| 26             | p.R213Q          | c.638G>A           | 0.0001              | 0.0003    | 10735         | -3.753        | Deleterious                |
| 5              | p.I232N          | c.695T>A           | 0.0000              | 0.0000    | not available | -6.312        | Deleterious                |
| 30             | p.Y234D          | c.700T>G           | 0.0000              | 0.0000    | 43768         | -7.736        | Deleterious                |
| 33             | p.Y236D          | c.706T>G           | 0.0000              | 0.0001    | 43602         | -7.14         | Deleterious                |
| 9              | p.C238W          | c.714T>G           | 0.0001              | 0.0003    | 44676         | -10.733       | Deleterious                |
| 14 36          | p.N239D          | c.715A>G           | 0.0005              | 0.0014    | 10777         | -4.54         | Deleterious                |
| 11             | p.C242Y          | c.725G>A           | 0.0000              | 0.0000    | 43713         | -10.742       | Deleterious                |
| 7 13 31        | p.G245S          | c.733G>A           | 0.0005              | 0.0015    | 10659         | -5.877        | Deleterious                |
| 35             | p.R248W          | c.742C>T           | 0.0000              | 0.0001    | 10656         | -7.826        | Deleterious                |
| 8 18 21 27     | p.R248Q          | c.743G>A           | 0.0001              | 0.0002    | 10662         | -3.915        | Deleterious                |
| 39             | p.R249S          | c.747G>C           | 0.0000              | 0.0001    | 10785         | -5.864        | Deleterious                |
| 22             | p.T253Pfs*92     | c.756delC          | 0.0003              | 0.0007    | 44623         | -7.659        | Deleterious                |
| 37             | E258D            | c.774A>C           | 0.0000              | 0.0001    | 46410         | -2.911        | Deleterious                |
| 10             | p.R267W          | c.799C>T           | 0.0001              | 0.0002    | 11183         | -7.651        | Deleterious                |
| 17             | p.R273C          | c.817C>T           | 0.0000              | 0.0000    | 48817         | -4.775        | Deleterious                |
| 2 4 34 38      | p.R273H          | c.818G>A           | 0.0002              | 0.0005    | 10660         | -8.614        | Deleterious                |
| 16             | p.D281V          | c.842A>T           | 0.0001              | 0.0003    | 11152         | -7.65         | Deleterious                |
| 29             | p.R282W          | c.844C>T           | 0.0000              | 0.0000    | 10704         | -10.263       | Deleterious                |
| 12             | p.R282-R283insHR | c.847-848insATCGGG | 0.0003              | 0.0005    | not available | /             | /                          |

Score thresholds for prediction is -2.5, that is: Variants with a score equal to or below -2.5 are considered "deleterious,"; Variants with a score above -2.5 are considered "neutral".

**Table S3.** Response to treatment in different group of ctDNA profile.

| Variable                                       | Favorable | Unfavorable |
|------------------------------------------------|-----------|-------------|
| Response—no. (%)                               |           |             |
| Complete response (CR)                         | 20        | 0           |
| Partial response (PR)                          | 5         | 1           |
| Stable disease (SD)                            | 0         | 2           |
| Progressive disease (PD)                       | 2         | 10          |
| Objective response rate (CR + PR)% of patients | 92.6%     | 7.7%        |
